# Supplementary material for: Analysis of Mortality and Morbidity in COVID-19 Patients with Obesity Using Clinical Epidemiological Data from the Korean Center for Disease Control & Prevention
Source: PubMed Central journal article supplement (PMC7764883; doi:10.3390/ijerph17249336), 2020-12-14
Supplement: ijerph-17-09336-s001.pdf [file ijerph-17-09336-s001.pdf]

Table S1 Testing the joint significance of all predictors for mortality by obesity in Cox regression.

| Test             | Chi-Square | DF | P-value |
|------------------|------------|----|---------|
| Likelihood Ratio | 436.78     | 25 | <0.001  |
| Score            | 589.99     | 25 | <0.001  |
| Wald             | 276.21     | 25 | <0.001  |

Table S2 Testing the joint significance of all predictors for morbidity by obesity in Logistic regression.

| Test             | Chi-Square | DF | P-value |
|------------------|------------|----|---------|
| Likelihood Ratio | 885.43     | 25 | <0.001  |
| Score            | 884.37     | 25 | <0.001  |
| Wald             | 572.73     | 25 | <0.001  |

Table S3 Subgroup analyses of crude and adjusted hazard ratios (95% confidence interval) for mortality in obesity.

| Characteristics                          | Hazard ratios for death |         |                       |         |
|------------------------------------------|-------------------------|---------|-----------------------|---------|
|                                          | Crude                   | P-value | Adjusted <sup>†</sup> | P-value |
| <b>Age &lt; 50 years old (n = 2,039)</b> |                         |         |                       |         |
| Underweight (< 18.5)                     | 1                       |         | 1                     |         |
| Normal (≥ 18.5 to < 23)                  | N/A                     |         | N/A                   |         |
| Overweight (≥ 23 to < 25)                | N/A                     |         | N/A                   |         |
| Obese (≥ 25)                             | N/A                     |         | N/A                   |         |
| <b>Age ≥ 50 years old (n = 2,018)</b>    |                         |         |                       |         |
| Underweight (< 18.5)                     | 3.07 (1.72-5.51)        | <0.001* | 2.10 (1.11-3.97)      | 0.022*  |
| Normal (≥ 18.5 to < 23)                  | 1                       |         | 1                     |         |
| Overweight (≥ 23 to < 25)                | 0.62 (0.36-1.04)        | 0.070   | 0.79 (0.46-1.37)      | 0.400   |
| Obese (≥ 25)                             | 1.26 (0.84-1.91)        | 0.268   | 1.70 (1.09-2.64)      | 0.018*  |
| <b>Men (n = 1,723)</b>                   |                         |         |                       |         |
| Underweight (< 18.5)                     | 1.68 (0.64-4.43)        | 0.294   | 1.28 (0.43-3.82)      | 0.657   |
| Normal (≥ 18.5 to < 23)                  | 1                       |         | 1                     |         |
| Overweight (≥ 23 to < 25)                | 0.83 (0.43-1.61)        | 0.576   | 0.91 (0.44-1.91)      | 0.810   |
| Obese (≥ 25)                             | 1.27 (0.74-2.18)        | 0.395   | 2.14 (1.17-3.91)      | 0.013*  |
| <b>Women (n = 2,334)</b>                 |                         |         |                       |         |
| Underweight (< 18.5)                     | 3.42 (1.67-7.02)        | <0.001* | 3.80 (1.63-8.83)      | 0.002*  |
| Normal (≥ 18.5 to < 23)                  | 1                       |         | 1                     |         |
| Overweight (≥ 23 to < 25)                | 0.58 (0.24-1.43)        | 0.239   | 0.66 (0.26-1.70)      | 0.393   |
| Obese (≥ 25)                             | 1.14 (0.59-2.23)        | 0.694   | 0.97 (0.47-2.02)      | 0.941   |
| <b>With hypertension (n = 829)</b>       |                         |         |                       |         |
| Underweight (< 18.5)                     | 2.59 (1.22-5.49)        | 0.013*  | 3.71 (1.44-9.58)      | 0.007*  |
| Normal (≥ 18.5 to < 23)                  | 1                       |         | 1                     |         |
| Overweight (≥ 23 to < 25)                | 0.49 (0.26-0.92)        | 0.028*  | 0.83 (0.42-1.64)      | 0.596   |
| Obese (≥ 25)                             | 0.62 (0.37-1.07)        | 0.084   | 1.31 (0.72-2.37)      | 0.375   |
| <b>Without hypertension (n = 3,228)</b>  |                         |         |                       |         |
| Underweight (< 18.5)                     | 3.10 (1.28-7.49)        | 0.012*  | 1.52 (0.58-3.95)      | 0.393   |
| Normal (≥ 18.5 to < 23)                  | 1                       |         | 1                     |         |
| Overweight (≥ 23 to < 25)                | 0.76 (0.30-1.92)        | 0.558   | 0.74 (0.27-2.04)      | 0.560   |
| Obese (≥ 25)                             | 1.92 (1.00-3.69)        | 0.052   | 2.66 (1.24-5.72)      | 0.012*  |
| <b>With heart failure (n = 40)</b>       |                         |         |                       |         |
| Underweight (< 18.5)                     | 1.63 (0.27-9.79)        | 0.594   | N/A                   |         |
| Normal (≥ 18.5 to < 23)                  | 1                       |         | 1                     |         |
| Overweight (≥ 23 to < 25)                | N/A                     |         | N/A                   |         |
| Obese (≥ 25)                             | 1.67 (0.40-7.03)        | 0.482   | N/A                   |         |
| <b>Without heart failure (n = 4017)</b>  |                         |         |                       |         |
| Underweight (< 18.5)                     | 2.45 (1.34-4.48)        | 0.004*  | 2.65 (1.39-5.06)      | 0.003*  |
| Normal (≥ 18.5 to < 23)                  | 1                       |         | 1                     |         |
| Overweight (≥ 23 to < 25)                | 0.85 (0.50-1.44)        | 0.544   | 0.93 (0.53-1.62)      | 0.795   |

|                                                                  |                   |        |                     |         |
|------------------------------------------------------------------|-------------------|--------|---------------------|---------|
| Obese ( $\geq 25$ )                                              | 1.29 (0.83-1.98)  | 0.258  | 1.74 (1.09-2.78)    | 0.021*  |
| <b>With chronic heart disease (n = 132)</b>                      |                   |        |                     |         |
| Underweight ( $< 18.5$ )                                         | 1.83 (0.38-8.85)  | 0.453  | N/A                 |         |
| Normal ( $\geq 18.5$ to $< 23$ )                                 | 1                 |        | 1                   |         |
| Overweight ( $\geq 23$ to $< 25$ )                               | 0.15 (0.02-1.25)  | 0.080  | N/A                 |         |
| Obese ( $\geq 25$ )                                              | 0.50 (0.15-1.67)  | 0.259  | N/A                 |         |
| <b>Without chronic heart disease (n = 3,925)</b>                 |                   |        |                     |         |
| Underweight ( $< 18.5$ )                                         | 2.71 (1.47-5.00)  | 0.001* | 2.55 (1.31-4.93)    | 0.006*  |
| Normal ( $\geq 18.5$ to $< 23$ )                                 | 1                 |        | 1                   |         |
| Overweight ( $\geq 23$ to $< 25$ )                               | 0.92 (0.53-1.60)  | 0.779  | 0.96 (0.54-1.69)    | 0.876   |
| Obese ( $\geq 25$ )                                              | 1.50 (0.96-2.35)  | 0.072  | 1.85 (1.15-2.99)    | 0.012*  |
| <b>With asthma (n = 96)</b>                                      |                   |        |                     |         |
| Underweight ( $< 18.5$ )                                         | 3.58 (0.32-39.84) | 0.300  | 2.99 (0.00-5028.39) | 0.773   |
| Normal ( $\geq 18.5$ to $< 23$ )                                 | 1                 |        | 1                   |         |
| Overweight ( $\geq 23$ to $< 25$ )                               | N/A               |        | 0.64 (0.01-61.79)   | 0.849   |
| Obese ( $\geq 25$ )                                              | 1.43 (0.24-8.60)  | 0.695  | 1.05 (0.02-62.02)   | 0.981   |
| <b>Without asthma (n = 3,961)</b>                                |                   |        |                     |         |
| Underweight ( $< 18.5$ )                                         | 2.52 (1.40-4.53)  | 0.002* | 2.65 (1.40-5.03)    | 0.003*  |
| Normal ( $\geq 18.5$ to $< 23$ )                                 | 1                 |        | 1                   |         |
| Overweight ( $\geq 23$ to $< 25$ )                               | 0.84 (0.50-1.43)  | 0.530  | 0.84 (0.48-1.47)    | 0.550   |
| Obese ( $\geq 25$ )                                              | 1.29 (0.84-1.98)  | 0.254  | 1.62 (1.02-2.56)    | 0.040*  |
| <b>With chronic obstructive pulmonary disease (n = 30)</b>       |                   |        |                     |         |
| Underweight ( $< 18.5$ )                                         | N/A               |        | N/A                 |         |
| Normal ( $\geq 18.5$ to $< 23$ )                                 | 1                 |        | 1                   |         |
| Overweight ( $\geq 23$ to $< 25$ )                               | N/A               |        | N/A                 |         |
| Obese ( $\geq 25$ )                                              | N/A               |        | N/A                 |         |
| <b>Without chronic obstructive pulmonary disease (n = 4,027)</b> |                   |        |                     |         |
| Underweight ( $< 18.5$ )                                         | 2.44 (1.36-4.37)  | 0.003* | 2.17 (1.15-4.12)    | 0.017*  |
| Normal ( $\geq 18.5$ to $< 23$ )                                 | 1                 |        | 1                   |         |
| Overweight ( $\geq 23$ to $< 25$ )                               | 0.75 (0.44-1.28)  | 0.287  | 0.71 (0.41-1.24)    | 0.226   |
| Obese ( $\geq 25$ )                                              | 1.28 (0.84-1.95)  | 0.244  | 1.53 (0.99-2.38)    | 0.058   |
| <b>With chronic kidney disease (n = 43)</b>                      |                   |        |                     |         |
| Underweight ( $< 18.5$ )                                         | 2.32 (0.25-22.01) | 0.462  | N/A                 |         |
| Normal ( $\geq 18.5$ to $< 23$ )                                 | 1                 |        | 1                   |         |
| Overweight ( $\geq 23$ to $< 25$ )                               | 1.77 (0.30-10.38) | 0.527  | N/A                 |         |
| Obese ( $\geq 25$ )                                              | 1.05 (0.23-4.71)  | 0.954  | N/A                 |         |
| <b>Without chronic kidney disease (n = 4,014)</b>                |                   |        |                     |         |
| Underweight ( $< 18.5$ )                                         | 2.63 (1.46-4.74)  | 0.001* | 2.01 (1.05-3.86)    | 0.035*  |
| Normal ( $\geq 18.5$ to $< 23$ )                                 | 1                 |        | 1                   |         |
| Overweight ( $\geq 23$ to $< 25$ )                               | 0.78 (0.45-1.35)  | 0.372  | 0.71 (0.40-1.26)    | 0.239   |
| Obese ( $\geq 25$ )                                              | 1.39 (0.90-2.13)  | 0.137  | 1.73 (1.10-2.73)    | 0.019*  |
| <b>With cancer (n = 107)</b>                                     |                   |        |                     |         |
| Underweight ( $< 18.5$ )                                         | 1.83 (0.38-8.83)  | 0.451  | N/A                 |         |
| Normal ( $\geq 18.5$ to $< 23$ )                                 | 1                 |        | 1                   |         |
| Overweight ( $\geq 23$ to $< 25$ )                               | N/A               |        | N/A                 |         |
| Obese ( $\geq 25$ )                                              | 0.91 (0.23-3.53)  | 0.891  | N/A                 |         |
| <b>Without cancer (n = 3,950)</b>                                |                   |        |                     |         |
| Underweight ( $< 18.5$ )                                         | 2.72 (1.47-5.02)  | 0.001* | 2.40 (1.22-4.73)    | 0.011*  |
| Normal ( $\geq 18.5$ to $< 23$ )                                 | 1                 |        | 1                   |         |
| Overweight ( $\geq 23$ to $< 25$ )                               | 0.96 (0.56-1.65)  | 0.885  | 0.92 (0.52-1.62)    | 0.774   |
| Obese ( $\geq 25$ )                                              | 1.52 (0.98-2.36)  | 0.063  | 1.82 (1.14-2.90)    | 0.013*  |
| <b>With chronic liver disease (n = 58)</b>                       |                   |        |                     |         |
| Underweight ( $< 18.5$ )                                         | N/A               | 0.000  | N/A                 |         |
| Normal ( $\geq 18.5$ to $< 23$ )                                 | 1                 |        | 1                   |         |
| Overweight ( $\geq 23$ to $< 25$ )                               | N/A               | 0.000  | N/A                 |         |
| Obese ( $\geq 25$ )                                              | N/A               | 0.000  | N/A                 |         |
| <b>Without chronic liver disease (n = 3,999)</b>                 |                   |        |                     |         |
| Underweight ( $< 18.5$ )                                         | 2.47 (1.38-4.42)  | 0.002* | 2.35 (1.25-4.41)    | 0.008*  |
| Normal ( $\geq 18.5$ to $< 23$ )                                 | 1                 |        | 1                   |         |
| Overweight ( $\geq 23$ to $< 25$ )                               | 0.76 (0.44-1.29)  | 0.308  | 0.77 (0.44-1.34)    | 0.349   |
| Obese ( $\geq 25$ )                                              | 1.33 (0.88-2.01)  | 0.181  | 1.72 (1.10-2.67)    | 0.0174* |
| <b>With rheumatic disease and autoimmune disease (n = 31)</b>    |                   |        |                     |         |

|                                                                     |                  |        |                   |        |
|---------------------------------------------------------------------|------------------|--------|-------------------|--------|
| Underweight (< 18.5)                                                | N/A              |        | N/A               |        |
| Normal (≥ 18.5 to < 23)                                             | 1                |        | 1                 |        |
| Overweight (≥ 23 to < 25)                                           | N/A              |        | N/A               |        |
| Obese (≥ 25)                                                        | N/A              |        | N/A               |        |
| <b>Without rheumatic disease and autoimmune disease (n = 4,026)</b> |                  |        |                   |        |
| Underweight (< 18.5)                                                | 2.54 (1.44-4.49) | 0.001* | 2.24 (1.20-4.18)  | 0.011* |
| Normal (≥ 18.5 to < 23)                                             | 1                |        | 1                 |        |
| Overweight (≥ 23 to < 25)                                           | 0.79 (0.47-1.34) | 0.390  | 0.81 (0.47-1.40)  | 0.449  |
| Obese (≥ 25)                                                        | 1.32 (0.87-2.00) | 0.196  | 1.66 (1.07-2.58)  | 0.025* |
| <b>With dementia (n = 120)</b>                                      |                  |        |                   |        |
| Underweight (< 18.5)                                                | 3.01 (1.28-7.09) | 0.012* | 5.63 (1.94-16.32) | 0.002* |
| Normal (≥ 18.5 to < 23)                                             | 1                |        | 1                 |        |
| Overweight (≥ 23 to < 25)                                           | 1.24 (0.45-3.43) | 0.685  | 0.90 (0.26-3.13)  | 0.869  |
| Obese (≥ 25)                                                        | 2.23 (0.85-5.86) | 0.104  | 1.30 (0.39-4.29)  | 0.668  |
| <b>Without dementia (n = 3,937)</b>                                 |                  |        |                   |        |
| Underweight (< 18.5)                                                | 1.69 (0.74-3.84) | 0.210  | 1.41 (0.56-3.58)  | 0.470  |
| Normal (≥ 18.5 to < 23)                                             | 1                |        | 1                 |        |
| Overweight (≥ 23 to < 25)                                           | 0.86 (0.46-1.59) | 0.628  | 0.86 (0.45-1.65)  | 0.655  |
| Obese (≥ 25)                                                        | 1.66 (1.04-2.68) | 0.036* | 1.81 (1.08-3.03)  | 0.024* |

Abbreviation: N/A, Not applicable.

\* Cox proportional hazard regression model, Significance at P < 0.05.

† The model was adjusted for age, sex, obesity, systolic blood pressure, diastolic blood pressure, heart rate, temperature, diabetes, hypertension, heart failure, chronic heart disease, asthma, chronic obstructive pulmonary disease, chronic kidney disease, cancer, chronic liver disease, rheumatic or autoimmune disease, and dementia.

**Table S4 Subgroup analyses of crude and adjusted odds ratios (95% confidence interval) for maximum morbidity score during hospitalization.**

| Obesity (BMI, kg/m <sup>2</sup> )        | ORs for high morbidity |         |                  |         |
|------------------------------------------|------------------------|---------|------------------|---------|
|                                          | Crude                  | P-value | Adjusted†        | P-value |
| <b>Age &lt; 50 years old (n = 2,039)</b> |                        |         |                  |         |
| Underweight (< 18.5)                     | 1.64 (0.53-5.06)       | 0.386   | 2.08 (0.59-7.25) | 0.253   |
| Normal (≥ 18.5 to < 23)                  | 1                      |         | 1                |         |
| Overweight (≥ 23 to < 25)                | 1.19 (0.48-2.96)       | 0.716   | 1.30 (0.49-3.42) | 0.597   |
| Obese (≥ 25)                             | 4.58 (2.46-8.53)       | <0.001* | 4.12 (2.03-8.39) | <0.001* |
| <b>Age ≥ 50 years old (n = 2,018)</b>    |                        |         |                  |         |
| Underweight (< 18.5)                     | 1.83 (1.14-2.94)       | 0.013*  | 1.17 (0.68-2.02) | 0.574   |
| Normal (≥ 18.5 to < 23)                  | 1                      |         | 1                |         |
| Overweight (≥ 23 to < 25)                | 1.02 (0.79-1.32)       | 0.882   | 1.10 (0.82-1.46) | 0.539   |
| Obese (≥ 25)                             | 1.38 (1.08-1.77)       | 0.010*  | 1.43 (1.08-1.90) | 0.013*  |
| <b>Men (n = 1,723)</b>                   |                        |         |                  |         |
| Underweight (< 18.5)                     | 1.68 (0.93-3.07)       | 0.088   | 2.50 (1.08-5.78) | 0.032*  |
| Normal (≥ 18.5 to < 23)                  | 1                      |         | 1                |         |
| Overweight (≥ 23 to < 25)                | 1.39 (0.98-1.98)       | 0.067   | 1.48 (0.96-2.30) | 0.078   |
| Obese (≥ 25)                             | 1.69 (1.23-2.33)       | 0.001*  | 2.32 (1.53-3.51) | <0.001* |
| <b>Women (n = 2,334)</b>                 |                        |         |                  |         |
| Underweight (< 18.5)                     | 1.03 (0.61-1.74)       | 0.906   | 0.99 (0.52-1.87) | 0.962   |
| Normal (≥ 18.5 to < 23)                  | 1                      |         | 1                |         |
| Overweight (≥ 23 to < 25)                | 1.20 (0.87-1.67)       | 0.262   | 0.98 (0.68-1.42) | 0.929   |
| Obese (≥ 25)                             | 1.64 (1.22-2.20)       | 0.001*  | 1.47 (1.04-2.08) | 0.031*  |
| <b>With hypertension (n = 829)</b>       |                        |         |                  |         |
| Underweight (< 18.5)                     | 1.43 (0.65-3.15)       | 0.374   | 1.37 (0.55-3.39) | 0.502   |
| Normal (≥ 18.5 to < 23)                  | 1                      |         | 1                |         |
| Overweight (≥ 23 to < 25)                | 0.61 (0.41-0.90)       | 0.014*  | 0.76 (0.49-1.19) | 0.235   |
| Obese (≥ 25)                             | 0.62 (0.44-0.89)       | 0.010*  | 0.86 (0.57-1.32) | 0.498   |
| <b>Without hypertension (n = 3,228)</b>  |                        |         |                  |         |
| Underweight (< 18.5)                     | 1.38 (0.84-2.25)       | 0.200   | 1.31 (0.71-2.42) | 0.394   |
| Normal (≥ 18.5 to < 23)                  | 1                      |         | 1                |         |

|                                                                  |                   |            |                   |            |
|------------------------------------------------------------------|-------------------|------------|-------------------|------------|
| Overweight ( $\geq 23$ to $< 25$ )                               | 1.48 (1.08-2.02)  | 0.015*     | 1.42 (1.00-2.03)  | 0.053      |
| Obese ( $\geq 25$ )                                              | 2.11 (1.60-2.79)  | $<0.001^*$ | 2.73 (1.95-3.81)  | $<0.001^*$ |
| <b>With heart failure (n = 40)</b>                               |                   |            |                   |            |
| Underweight ( $< 18.5$ )                                         | 0.71 (0.10-5.12)  | 0.738      | N/A               |            |
| Normal ( $\geq 18.5$ to $< 23$ )                                 | 1                 |            | 1                 |            |
| Overweight ( $\geq 23$ to $< 25$ )                               | 1.19 (0.19-7.46)  | 0.852      | N/A               |            |
| Obese ( $\geq 25$ )                                              | 0.95 (0.20-4.54)  | 0.951      | N/A               |            |
| <b>Without heart failure (n = 4017)</b>                          |                   |            |                   |            |
| Underweight ( $< 18.5$ )                                         | 1.21 (0.80-1.81)  | 0.369      | 1.40 (0.85-2.32)  | 0.187      |
| Normal ( $\geq 18.5$ to $< 23$ )                                 | 1                 |            | 1                 |            |
| Overweight ( $\geq 23$ to $< 25$ )                               | 1.33 (1.04-1.68)  | 0.021*     | 1.16 (0.88-1.52)  | 0.309      |
| Obese ( $\geq 25$ )                                              | 1.72 (1.38-2.13)  | $<0.001^*$ | 1.75 (1.34-2.27)  | $<0.001^*$ |
| <b>With chronic heart disease (n = 132)</b>                      |                   |            |                   |            |
| Underweight ( $< 18.5$ )                                         | 1.06 (0.21-5.35)  | 0.945      | N/A               |            |
| Normal ( $\geq 18.5$ to $< 23$ )                                 | 1                 |            | 1                 |            |
| Overweight ( $\geq 23$ to $< 25$ )                               | 0.54 (0.21-1.36)  | 0.189      | 0.41 (0.09-1.98)  | 0.269      |
| Obese ( $\geq 25$ )                                              | 0.66 (0.27-1.60)  | 0.357      | 0.51 (0.12-2.13)  | 0.357      |
| <b>Without chronic heart disease (n = 3,925)</b>                 |                   |            |                   |            |
| Underweight ( $< 18.5$ )                                         | 1.26 (0.84-1.90)  | 0.261      | 1.29 (0.77-2.15)  | 0.339      |
| Normal ( $\geq 18.5$ to $< 23$ )                                 | 1                 |            | 1                 |            |
| Overweight ( $\geq 23$ to $< 25$ )                               | 1.37 (1.07-1.74)  | 0.013*     | 1.19 (0.90-1.57)  | 0.236      |
| Obese ( $\geq 25$ )                                              | 1.78 (1.43-2.23)  | $<0.001^*$ | 1.77 (1.35-2.31)  | $<0.001^*$ |
| <b>With asthma (n = 96)</b>                                      |                   |            |                   |            |
| Underweight ( $< 18.5$ )                                         | 1.25 (0.11-13.68) | 0.855      | 0.30 (0.00-54.09) | 0.649      |
| Normal ( $\geq 18.5$ to $< 23$ )                                 | 1                 |            | 1                 |            |
| Overweight ( $\geq 23$ to $< 25$ )                               | 0.96 (0.25-3.73)  | 0.955      | 0.10 (0.00-3.63)  | 0.211      |
| Obese ( $\geq 25$ )                                              | 3.33 (1.00-11.14) | 0.051      | 2.52 (0.26-24.19) | 0.423      |
| <b>Without asthma (n = 3,961)</b>                                |                   |            |                   |            |
| Underweight ( $< 18.5$ )                                         | 1.26 (0.85-1.87)  | 0.258      | 1.36 (0.82-2.25)  | 0.229      |
| Normal ( $\geq 18.5$ to $< 23$ )                                 | 1                 |            | 1                 |            |
| Overweight ( $\geq 23$ to $< 25$ )                               | 1.33 (1.05-1.69)  | 0.019*     | 1.13 (0.85-1.49)  | 0.400      |
| Obese ( $\geq 25$ )                                              | 1.66 (1.34-2.07)  | $<0.001^*$ | 1.65 (1.27-2.15)  | $<0.001^*$ |
| <b>With chronic obstructive pulmonary disease (n = 30)</b>       |                   |            |                   |            |
| Underweight ( $< 18.5$ )                                         | 1.80 (0.26-12.50) | 0.552      | N/A               |            |
| Normal ( $\geq 18.5$ to $< 23$ )                                 | 1                 |            | 1                 |            |
| Overweight ( $\geq 23$ to $< 25$ )                               | 7.20 (0.62-83.34) | 0.114      | N/A               |            |
| Obese ( $\geq 25$ )                                              | 7.20 (0.62-83.34) | 0.114      | N/A               |            |
| <b>Without chronic obstructive pulmonary disease (n = 4,027)</b> |                   |            |                   |            |
| Underweight ( $< 18.5$ )                                         | 1.19 (0.79-1.79)  | 0.404      | 1.37 (0.83-2.26)  | 0.224      |
| Normal ( $\geq 18.5$ to $< 23$ )                                 | 1                 |            | 1                 |            |
| Overweight ( $\geq 23$ to $< 25$ )                               | 1.31 (1.04-1.67)  | 0.025*     | 1.10 (0.84-1.45)  | 0.497      |
| Obese ( $\geq 25$ )                                              | 1.72 (1.39-2.13)  | $<0.001^*$ | 1.66 (1.28-2.16)  | $<0.001^*$ |
| <b>With chronic kidney disease (n = 43)</b>                      |                   |            |                   |            |
| Underweight ( $< 18.5$ )                                         | 0.44 (0.03-5.88)  | 0.538      | N/A               |            |
| Normal ( $\geq 18.5$ to $< 23$ )                                 | 1                 |            | 1                 |            |
| Overweight ( $\geq 23$ to $< 25$ )                               | 0.53 (0.10-2.98)  | 0.474      | N/A               |            |
| Obese ( $\geq 25$ )                                              | 1.78 (0.42-7.47)  | 0.432      | N/A               |            |
| <b>Without chronic kidney disease (n = 4,014)</b>                |                   |            |                   |            |
| Underweight ( $< 18.5$ )                                         | 1.29 (0.87-1.92)  | 0.212      | 1.36 (0.82-2.25)  | 0.232      |
| Normal ( $\geq 18.5$ to $< 23$ )                                 | 1                 |            | 1                 |            |
| Overweight ( $\geq 23$ to $< 25$ )                               | 1.36 (1.07-1.73)  | 0.012*     | 1.16 (0.88-1.53)  | 0.297      |
| Obese ( $\geq 25$ )                                              | 1.71 (1.38-2.13)  | $<0.001^*$ | 1.72 (1.32-2.23)  | $<0.001^*$ |
| <b>With cancer (n = 107)</b>                                     |                   |            |                   |            |
| Underweight ( $< 18.5$ )                                         | 0.73 (0.13-4.17)  | 0.723      | 0.71 (0.06-8.33)  | 0.788      |
| Normal ( $\geq 18.5$ to $< 23$ )                                 | 1                 |            | 1                 |            |
| Overweight ( $\geq 23$ to $< 25$ )                               | 0.33 (0.10-1.12)  | 0.076      | 0.22 (0.04-1.38)  | 0.106      |
| Obese ( $\geq 25$ )                                              | 0.67 (0.24-1.92)  | 0.458      | 0.43 (0.09-1.98)  | 0.278      |
| <b>Without cancer (n = 3,950)</b>                                |                   |            |                   |            |
| Underweight ( $< 18.5$ )                                         | 1.31 (0.87-1.96)  | 0.197      | 1.36 (0.82-2.28)  | 0.239      |
| Normal ( $\geq 18.5$ to $< 23$ )                                 | 1                 |            | 1                 |            |
| Overweight ( $\geq 23$ to $< 25$ )                               | 1.42 (1.12-1.81)  | 0.004*     | 1.21 (0.91-1.60)  | 0.186      |
| Obese ( $\geq 25$ )                                              | 1.82 (1.46-2.26)  | $<0.001^*$ | 1.84 (1.41-2.41)  | $<0.001^*$ |

|                                                                     |                    |         |                  |         |
|---------------------------------------------------------------------|--------------------|---------|------------------|---------|
| <b>With chronic liver disease (n = 58)</b>                          |                    |         |                  |         |
| Underweight (< 18.5)                                                | 7.50 (0.53-105.27) | 0.135   | N/A              |         |
| Normal (≥ 18.5 to < 23)                                             | 1                  |         | 1                |         |
| Overweight (≥ 23 to < 25)                                           | 0.94 (0.18-5.02)   | 0.940   | N/A              |         |
| Obese (≥ 25)                                                        | 1.88 (0.45-7.82)   | 0.388   | N/A              |         |
| <b>Without chronic liver disease (n = 3,999)</b>                    |                    |         |                  |         |
| Underweight (< 18.5)                                                | 1.20 (0.81-1.80)   | 0.364   | 1.27 (0.77-2.11) | 0.349   |
| Normal (≥ 18.5 to < 23)                                             | 1                  |         | 1                |         |
| Overweight (≥ 23 to < 25)                                           | 1.33 (1.05-1.69)   | 0.019*  | 1.12 (0.85-1.48) | 0.406   |
| Obese (≥ 25)                                                        | 1.70 (1.37-2.11)   | <0.001* | 1.71 (1.32-2.22) | <0.001* |
| <b>With rheumatic disease and autoimmune disease (n = 31)</b>       |                    |         |                  |         |
| Underweight (< 18.5)                                                | N/A                |         | N/A              |         |
| Normal (≥ 18.5 to < 23)                                             | 1                  |         | 1                |         |
| Overweight (≥ 23 to < 25)                                           | 0.37 (0.04-3.84)   | 0.406   | N/A              |         |
| Obese (≥ 25)                                                        | 0.87 (0.07-10.42)  | 0.910   | N/A              |         |
| <b>Without rheumatic disease and autoimmune disease (n = 4,026)</b> |                    |         |                  |         |
| Underweight (< 18.5)                                                | 1.29 (0.87-1.91)   | 0.206   | 1.31 (0.80-2.16) | 0.285   |
| Normal (≥ 18.5 to < 23)                                             | 1                  |         | 1                |         |
| Overweight (≥ 23 to < 25)                                           | 1.35 (1.07-1.71)   | 0.013*  | 1.16 (0.88-1.52) | 0.306   |
| Obese (≥ 25)                                                        | 1.74 (1.41-2.16)   | <0.001* | 1.72 (1.33-2.23) | <0.001* |
| <b>With dementia (n = 120)</b>                                      |                    |         |                  |         |
| Underweight (< 18.5)                                                | 1.39 (0.51-3.80)   | 0.527   | 2.05 (0.59-7.17) | 0.260   |
| Normal (≥ 18.5 to < 23)                                             | 1                  |         | 1                |         |
| Overweight (≥ 23 to < 25)                                           | 1.13 (0.42-3.10)   | 0.807   | 0.73 (0.22-2.39) | 0.604   |
| Obese (≥ 25)                                                        | 1.46 (0.48-4.39)   | 0.504   | 1.03 (0.26-4.08) | 0.968   |
| <b>Without dementia (n = 3,937)</b>                                 |                    |         |                  |         |
| Underweight (< 18.5)                                                | 1.03 (0.65-1.64)   | 0.895   | 1.22 (0.69-2.15) | 0.499   |
| Normal (≥ 18.5 to < 23)                                             | 1                  |         | 1                |         |
| Overweight (≥ 23 to < 25)                                           | 1.44 (1.13-1.85)   | 0.004*  | 1.14 (0.86-1.52) | 0.365   |
| Obese (≥ 25)                                                        | 1.92 (1.53-2.40)   | <0.001* | 1.73 (1.32-2.26) | <0.001* |

Abbreviation: N/A, Not applicable.

\* Logistic regression model, Significance at P < 0.05.

† The model was adjusted for age, sex, obesity, systolic blood pressure, diastolic blood pressure, heart rate, temperature, diabetes, hypertension, heart failure, chronic heart disease, asthma, chronic obstructive pulmonary disease, chronic kidney disease, cancer, chronic liver disease, rheumatic or autoimmune disease, and dementia.
